# Supplementary material for: Controlled synthesis of hierarchical ZSM-5 for catalytic fast pyrolysis of cellulose to aromatics
Source: Royal Society of Chemistry journal article supplement (doi:10.1039/c8ta08930b), 2018-01-01
Supplement: c8ta08930b1.pdf [file c8ta08930b1.pdf]

# Control Synthesis of Hierarchical ZSM-5 for Catalytic Fast Pyrolysis of Cellulose to Aromatics

Hao Chen<sup>a</sup>, Xu Shi<sup>a, d</sup>, Jianfang Liu<sup>e</sup>, Kecheng Jie<sup>b</sup>, Zihao Zhang<sup>a</sup>, Xiaobing Hu<sup>f</sup>, Yimei Zhu<sup>f</sup>,  
Xiuyang Lu<sup>a</sup>, Jie Fu<sup>\*a</sup>, He Huang<sup>\*a, d</sup>, Sheng Dai<sup>\*b, c</sup>

<sup>a</sup> Key Laboratory of Biomass Chemical Engineering of Ministry of Education, College of  
Chemical and Biological Engineering, Zhejiang University, Hangzhou 310027, China.

<sup>b</sup> Department of Chemistry, The University of Tennessee, Knoxville, TN, USA.

<sup>c</sup> Oak Ridge National Laboratory, Oak Ridge, TN, USA.

<sup>d</sup> School of Pharmaceutical Sciences, Nanjing Tech University, Nanjing 211800, China.

<sup>e</sup> The Molecular Foundry, Lawrence Berkeley National Laboratory, Berkeley CA 94720, USA

<sup>f</sup> Condensed Matter Physics and Material Science Department, Brookhaven National Laboratory,  
Upton, New York 11973, USA

**Table S1.** Physical properties of conventional and hierarchical HZSM-5 synthesized using trimethoxymethylsilane (MTS), trimethoxy(propyl)silane (PTS), trimethoxy(octyl)silane (OTS) and hexadecyltrimethoxysilane (HTS) under pre-crystallizing 12 h.

|        | $S_{\text{BET}}$ ,               | $S_{\text{micro}}$ ,             | $S_{\text{meso}}$ ,              | $V_{\text{total}}$ ,              | $V_{\text{micro}}$ ,              | $V_{\text{meso}}$ ,               |
|--------|----------------------------------|----------------------------------|----------------------------------|-----------------------------------|-----------------------------------|-----------------------------------|
|        | $\text{m}^2 \cdot \text{g}^{-1}$ | $\text{m}^2 \cdot \text{g}^{-1}$ | $\text{m}^2 \cdot \text{g}^{-1}$ | $\text{cm}^3 \cdot \text{g}^{-1}$ | $\text{cm}^3 \cdot \text{g}^{-1}$ | $\text{cm}^3 \cdot \text{g}^{-1}$ |
| HZ-Con | 324.4                            | 213.2                            | 111.2                            | 0.224                             | 0.115                             | 0.091                             |
| ZMTS   | 369.8                            | 240.4                            | 129.4                            | 0.300                             | 0.125                             | 0.155                             |
| ZPTS   | 408.2                            | 209.9                            | 198.2                            | 0.446                             | 0.109                             | 0.316                             |
| ZOTS   | 390.9                            | 187.2                            | 203.7                            | 0.503                             | 0.099                             | 0.384                             |
| ZHTS   | 362.7                            | 228.5                            | 134.3                            | 0.304                             | 0.119                             | 0.165                             |

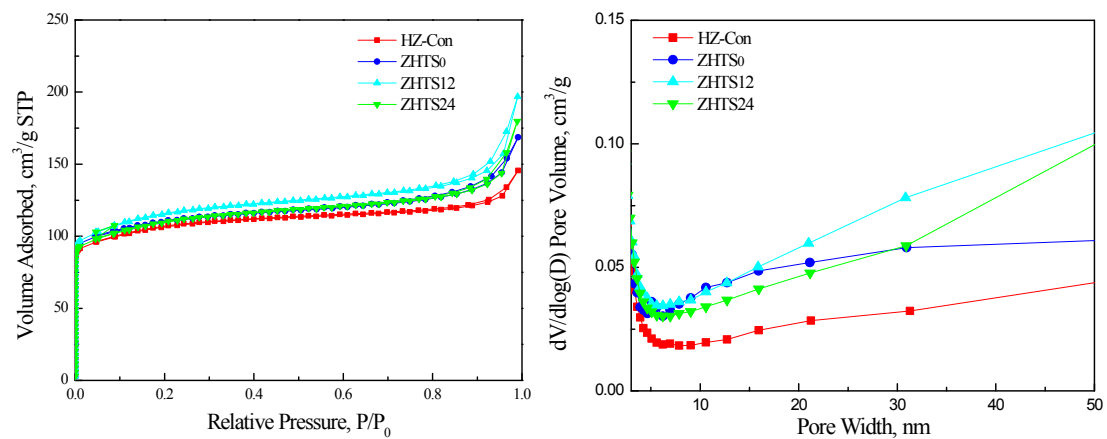

Figure S1.  $N_2$  adsorption–desorption isotherms and pore size distribution of conventional and hierarchical HZSM–5 zeolites prepared by hexadecyltrimethoxysilane (HTS) under pre-crystallizing 0 h, 12 h and 24 h.

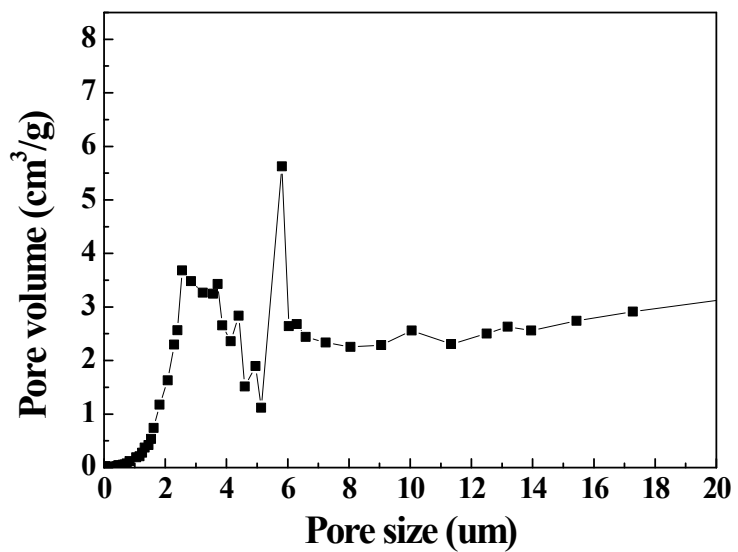

Figure S2. Pore size distribution from mercury injection analysis of the selected hierarchical ZSM-5 prepared by hexadecyltrimethoxysilane (HTS) under pre-crystallizing 12 h.

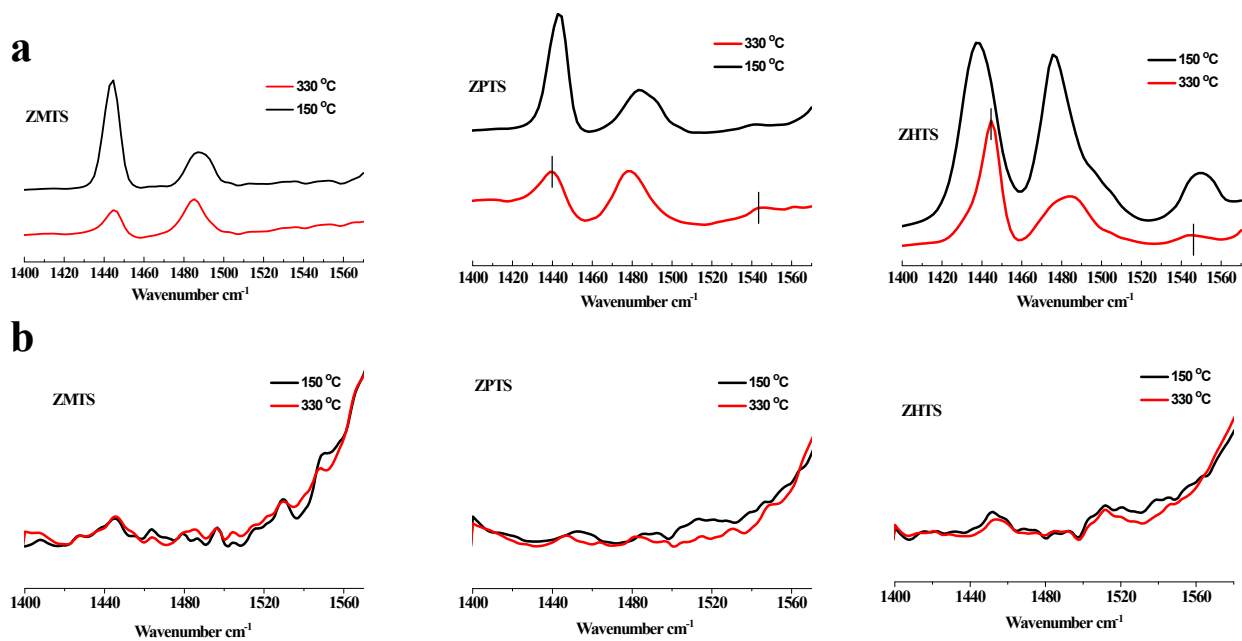

Figure S3. Py-FTIR spectra of ZMIS, ZPTS and ZHTS (a) pyridine and (b) dimethyl pyridine.

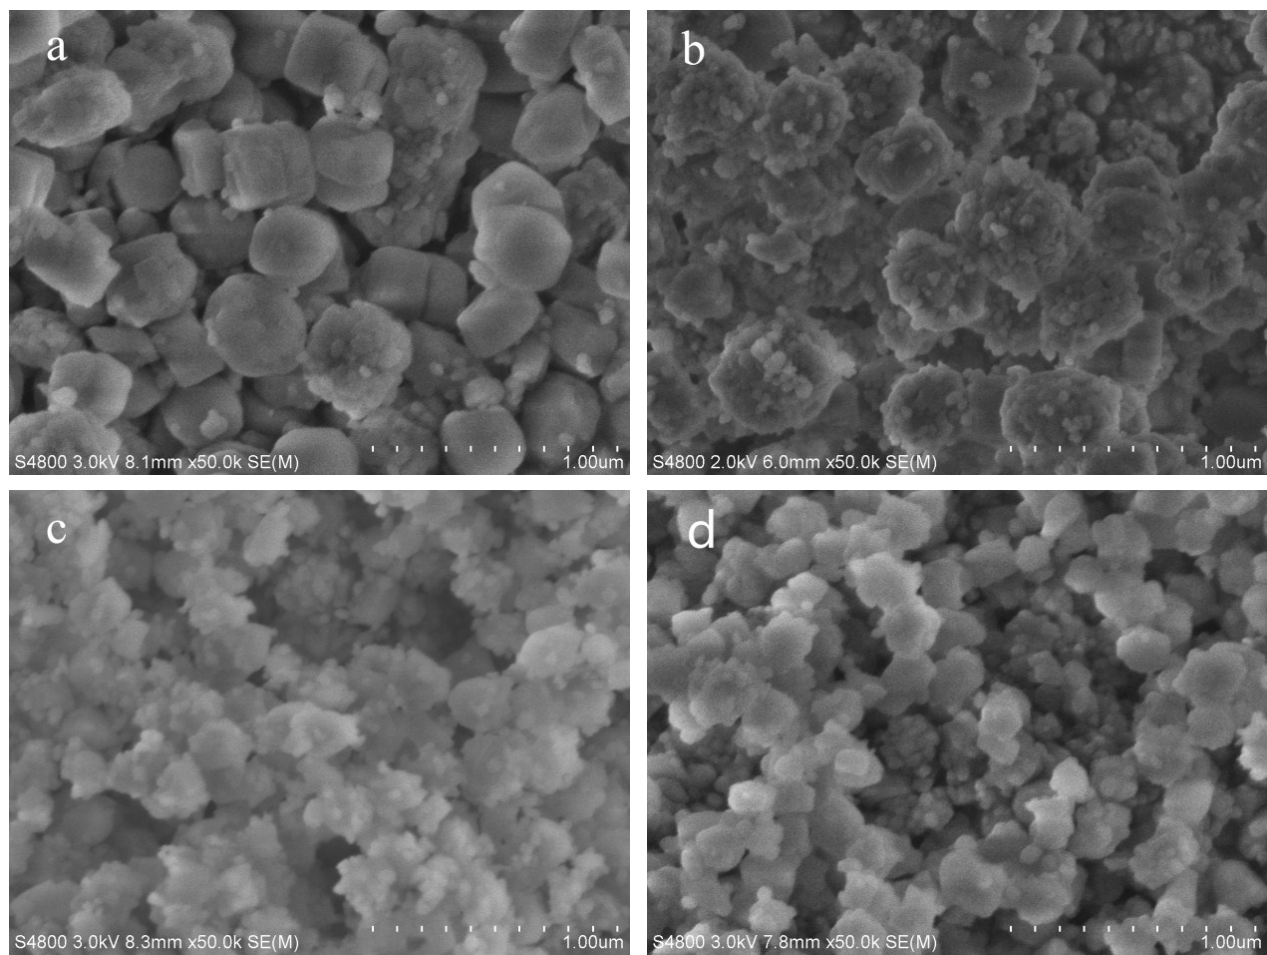

Figure S4. SEM images of hierarchical HZSM-5 zeolites synthesized using [a] trimethoxymethylsilane (MTS); [b] trimethoxy[propyl]silane (PTS); [c] trimethoxy[octyl]silane (OTS), and [d] hexadecyltrimethoxysilane (HTS) under pre-crystallizing for 12 h.

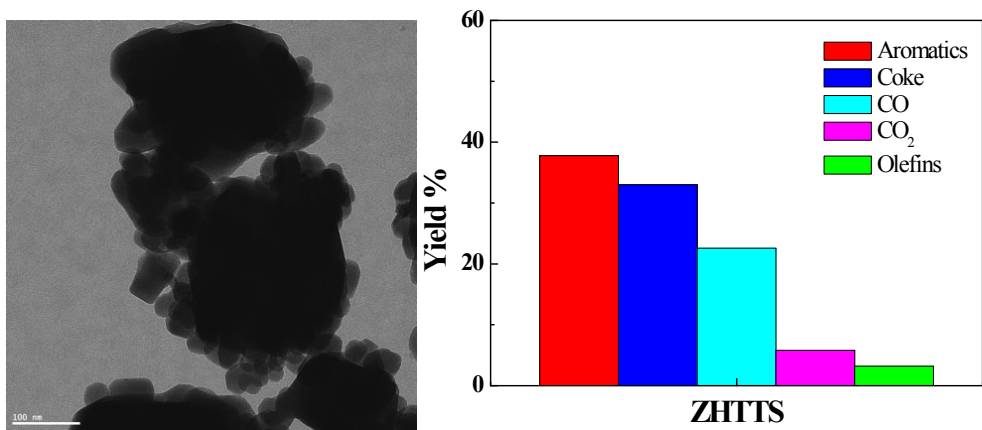

Figure S5. TEM result and CFP of cellulose over hierarchical ZSM-5 prepared by trimethoxyoctadecylsilane (TTS) under pre-crystallizing 12 h. Reaction conditions: 600 °C of reaction temperature and 1: 20 of biomass/catalyst ratio.

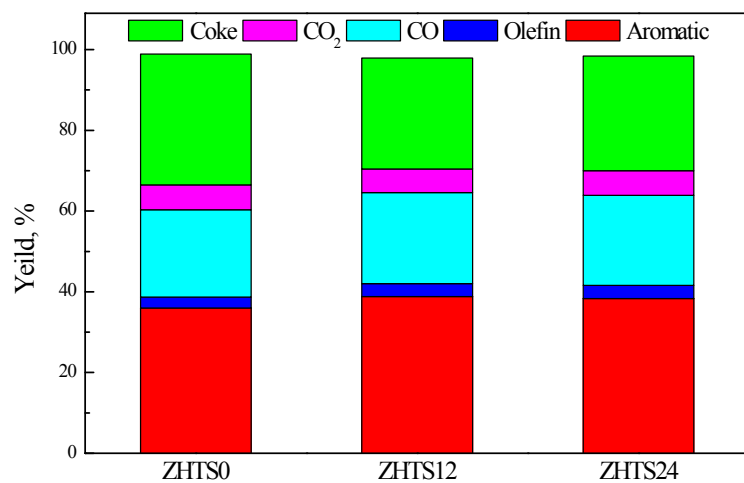

Figure S6. Product distributions in CFP of cellulose over hierarchical ZSM-5 prepared by hexadecyltrimethoxysilane (HTS) under pre-crystallizing 0 h, 12 h and 24 h. Reaction conditions: 600 °C of reaction temperature and 1: 20 of biomass/catalyst ratio.



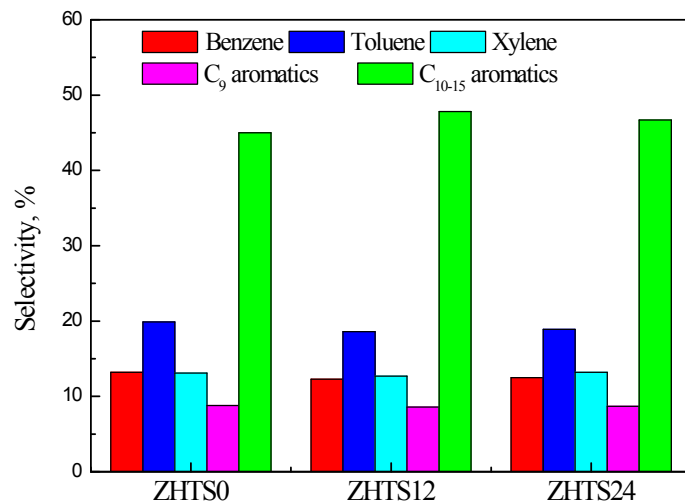

Figure S7. Aromatic distributions in CFP of cellulose over hierarchical ZSM-5 prepared by hexadecyltrimethoxysilane (HTS) under pre-crystallizing 0 h, 12 h and 24 h. Reaction conditions: 600 °C of reaction temperature and 1: 20 of biomass/catalyst ratio.
